# Supplementary material for: Coarse and Giant Particles are Ubiquitous in Saharan Dust Export Regionsand are Radiatively Significant over the Sahara
Source: Copernicus journal article supplement (doi:10.5194/acp-2019-421), 2019-06-27
Supplement: Supplementary file 1 [file acp-2019-421-supplement.zip]

## Supplement

Table S1: Lognormal Parameters for Fennec-Sahara 10<sup>th</sup> percentile PSD

| Mode | $d_{pg}, \mu m$ | $N_{tot}, cm^{-3}$ | $\sigma$ |
|------|-----------------|--------------------|----------|
| 1    | 0.039           | 129.377            | 2.50     |
| 2    | 0.726           | 0.672              | 1.33     |
| 3    | 2.144           | 0.132              | 1.48     |
| 4    | 4.503           | 0.125              | 1.84     |

Table S2: Lognormal parameters for Fennec-SAL PSD mean, minimum and maximum, fitted to observational data from Ryder et al. (2013a).

|                    |      | <b>Mode 1</b> | <b>Mode 2</b> | <b>Mode 3</b> | <b>Mode 4</b> |
|--------------------|------|---------------|---------------|---------------|---------------|
| $d_{pg}, \mu m$    | Mean | 0.024         | 0.687         | 2.174         | 6.277         |
| $\sigma_g$         |      | 2.500         | 1.380         | 1.438         | 1.620         |
| $N_{tot}, cm^{-3}$ |      | 946.031       | 2.599         | 0.559         | 0.122         |
| $d_{pg}, \mu m$    | Min  | 0.020         | 0.677         | 1.945         | 8.283         |
| $\sigma_g$         |      | 2.500         | 1.335         | 1.661         | 1.507         |
| $N_{tot}, cm^{-3}$ |      | 644.186       | 1.134         | 0.365         | 0.022         |
| $d_{pg}, \mu m$    | Max  | 0.021         | 0.660         | 2.279         | 6.300         |
| $\sigma_g$         |      | 2.500         | 1.431         | 1.405         | 1.632         |
| $N_{tot}, cm^{-3}$ |      | 2233.030      | 3.732         | 0.666         | 0.171         |
